# Supplementary material for: A paralog-specific role of COPI vesicles in the neuronal differentiation of mouse pluripotent cells
Source: Life Sci Alliance. 2020 Jul 14;3(9):e202000714. doi: 10.26508/lsa.202000714 (PMC7368096; doi:10.26508/lsa.202000714)
Supplement: Supplementary file 3 [file LSA-2020-00714_TableS2.xlsx]

## Sheet: List of sgRNAs and crRNAs
sgRNA/crRNA	sgRNA sequence	Targeted locus (genomic location, GRCm38)
Copg1 sgRNA (cas9)	GAAGAGTGCCGTACTCCAAG	Exon 2 (Ch 6: 87’889’102-121)
Copg2 sgRNA (Cas9)	CGGTATACATCTTCCTTTCC	Exon 6 (Ch 6: 30’863’572-591)
Copg1 crRNA1 (Cas12a)	TTCAACATGGTGTCAGCGGTAGCT	Exon 1 (Ch 6: 87’888’020-043)
Copg1 crRNA2 (Cas12a)	TTAACACAGTGGTCTGGGGAAGGG	Exon 24 (Ch 6: 87’912’378-401)
