# Supplementary material for: A paralog-specific role of COPI vesicles in the neuronal differentiation of mouse pluripotent cells
Source: Life Sci Alliance. 2020 Jul 14;3(9):e202000714. doi: 10.26508/lsa.202000714 (PMC7368096; doi:10.26508/lsa.202000714)
Supplement: Supplementary file 5 [file LSA-2020-00714_TableS4.xlsx]

## Sheet: Antibodies used in this study
Antibody	Supplier	Application and dilution
anti-Nanog	Biomol (A300397AT)	WB, 1:1000
anti-Oct-4	Abcam (ab18976)	WB, 1:500
anti-III-Tubulin ((TujI/TUBB3))	Biolegend (MMS435P25)	IF, WB, 1:1000
anti--COP (1409B)	Wieland Lab (Heidelberg)	WB, 1:5000
anti--COP (877)	Wieland Lab (Heidelberg)	WB, 1:1000
anti--COP	Wieland Lab (Heidelberg)	WB, 1:2000
anti-1-COP (anti-1-app)	Wieland Lab (Heidelberg)	WB, 1:500
anti-2-COP (anti-2-app)	Wieland Lab (Heidelberg)	WB, 1:500
anti-native coatomer (CM1A10/CM1)	Wieland Lab (Heidelberg)	IP: 100 L of hybridoma supernatant
Anti-cleaved Caspase-3	Cell Signaling (9661T)	IF, 1:100
anti-GAPDH	Proteintech (60004-1-Ig)	WB, 1:20000
anti--tubulin	Sigma (T5168)	WB, 1:10000
anti--tubulin	Abcam (Ab18251)	WB, 1:10000
Anti-GRP78	Proteintech (11587-1-AP)	WB, 1:1000
Anti-CHOP	Proteintech (15204-1-AP)	WB, 1:1000
